# Supplementary material for: Carbon aerogels with atomic dispersion of binary iron–cobalt sites as effective oxygen catalysts for flexible zinc–air batteries
Source: Royal Society of Chemistry journal article supplement (doi:10.1039/d0ta04633g), 2020-01-01
Supplement: d0ta04633g1.pdf [file d0ta04633g1.pdf]

Supporting Information

## **Carbon aerogels with atomic dispersion of binary iron-cobalt sites as effective oxygen catalysts for flexible zinc-air batteries**

Yang Chen,<sup>a</sup> Shengqiang Hu,<sup>b</sup> Forrest Nichols,<sup>c</sup> Frank Bridges,<sup>d</sup> Shuting Kan,<sup>a</sup> Ting He,<sup>a,\*</sup> Yi Zhang<sup>a,\*</sup> and Shaowei Chen,<sup>c,\*</sup>

<sup>a</sup> College of Chemistry and Chemical Engineering, Central South University, Changsha, Henan 410083, China

<sup>b</sup> State Key Laboratory for the Chemistry and Molecular Engineering of Medicinal Resources, College of Chemistry and Pharmacy, Guangxi Normal University, Guilin, Guangxi 541004, China

<sup>c</sup> Department of Chemistry and Biochemistry, University of California, 1156 High Street, Santa Cruz, CA 95064, USA

<sup>d</sup> Department of Physics, University of California, 1156 High Street, Santa Cruz, CA 95064, USA

**Table S1.** Porosity of NCAG/Fe-Co, NCAG/Fe, and NCAG/Co samples.

| Sample     | $S_{\text{BET}}$<br>( $\text{m}^2 \text{g}^{-1}$ ) | Pore volumes<br>( $\text{cm}^3 \text{g}^{-1}$ ) | Micropore<br>(%) | Mesopore<br>(%) | Macropore<br>(%) |
|------------|----------------------------------------------------|-------------------------------------------------|------------------|-----------------|------------------|
| NCAG/Fe-Co | 748.2                                              | 0.84                                            | 32.1             | 66.7            | 1.2              |
| NCAG/Co    | 822.7                                              | 1.05                                            | 25.7             | 72.4            | 1.9              |
| CACG/Fe    | 893.3                                              | 1.15                                            | 27.8             | 69.6            | 2.6              |

**Table S2.** Metal contents determined by ICP-OES measurements.

| Sample     | Fe (wt.%) | Co (wt.%) |
|------------|-----------|-----------|
| NCAG/Fe    | 0.6       |           |
| NCAG/Fe-Co | 0.7       | 1.1       |
| NCAG/Co    |           | 1.0       |

**Table S3.** Elemental contents of the various catalysts determined by XPS.

| Sample     | C (wt.%) | O (wt.%) | N (wt.%) | Fe (wt.%) | Co (wt.%) |
|------------|----------|----------|----------|-----------|-----------|
| NCAG/Fe    | 89.0     | 5.9      | 4.1      | 1.0       |           |
| NCAG/Fe-Co | 89.3     | 4.8      | 5.0      | 0.9       | 1.0       |
| NCAG/Co    | 89.4     | 4.7      | 4.6      |           | 1.3       |

**Table S4.** Binding energies and contents of various nitrogen dopants in the series of carbon aerogels.

| Sample     | pridinic N | M-N              | graphitic N |
|------------|------------|------------------|-------------|
| NCAG/Fe    | 398.14 eV  | <b>398.80 eV</b> | 401.02 eV   |
|            | 0.4 wt.%   | 0.8 wt.%         | 2.9 wt.%    |
| NCAG/Fe-Co | 398.16 eV  | <b>398.86 eV</b> | 401.00 eV   |
|            | 0.4 wt.%   | 1.4 wt.%         | 3.2 wt.%    |
| NCAG/Co    | 398.25 eV  | <b>399.03 eV</b> | 401.07 eV   |
|            | 0.5 wt.%   | 1.1 wt.%         | 2.9 wt.%    |

**Table S5.** Binding energies of Co and Fe 2p electrons in the series of carbon aerogels.

| Sample     | Co (eV) | Fe <sup>2+</sup> (eV) | Fe <sup>3+</sup> (eV) |
|------------|---------|-----------------------|-----------------------|
| NCAG/Fe-Co | 780.4   | 710.5                 | 715.0                 |
| NCAG/Fe    |         | 710.0                 | 714.7                 |
| NCAG/Co    | 780.6   |                       |                       |

**Table S6** EXAFS fitting results of FePc.

| Bond | Coordination number | r (Å) | $\sigma^2$ (Å <sup>2</sup> ) |
|------|---------------------|-------|------------------------------|
| Fe-N | 4                   | 1.962 | 0.0052                       |
| Fe-C | 8                   | 2.985 | 0.0045                       |
| Fe-N | 4                   | 3.214 | 0.0036                       |

**Table S7** Atomic positions of FeN<sub>3</sub>CoN<sub>3</sub> as depicted in Figure 3d.

| Atom | x      | y      | z     |
|------|--------|--------|-------|
| Fe   | 0      | 0      | 0     |
| N    | -1.803 | 0      | 0     |
| Co   | 2.787  | 0      | 0     |
| N    | 0      | 1.947  | 0     |
| N    | 0      | -1.947 | 0     |
| N    | 1.75   | 0      | 1.64  |
| N    | 1.75   | 0      | -1.64 |
| N    | 4.59   | 0      | 0     |

**Table S8.** EXAFS fitting results of NCAG/Fe-Co.

| Bond              | Coordination number | r (Å) | $\sigma^2$ (Å <sup>2</sup> ) |
|-------------------|---------------------|-------|------------------------------|
| Fe-N <sub>1</sub> | 1                   | 1.803 | 0.0013                       |
| Fe-N <sub>2</sub> | 2                   | 1.947 | 0.0015                       |
| Fe-N <sub>3</sub> | 2                   | 2.394 | 0.0017                       |
| Fe-Co             | 1                   | 2.787 | 0.0023                       |

**Table S9.** Comparison of the performance of flexible Zn-air batteries based on relevant oxygen catalysts.

| Catalyst                                     | Power density (mW cm <sup>-2</sup> ) | OCV (V) | Ref.      |
|----------------------------------------------|--------------------------------------|---------|-----------|
| NCAG/FeCo                                    | 117                                  | 1.47    | This work |
| N-doped Ni <sub>2</sub> CoO <sub>4</sub>     | 30                                   |         | 1         |
| FeCoNi/carbon nanotube                       | 85                                   | 1.45    | 2         |
| Fe-Co <sub>4</sub> N@N-C                     | 72                                   | 1.34    | 3         |
| Co <sub>3</sub> O <sub>4</sub> /carbon fiber |                                      | 1.33    | 4         |
| FeCo alloy/N-carbon                          | 98                                   | 1.25    | 5         |
| Zn, Co-N <sub>x</sub> -C-S <sub>y</sub>      | 15                                   | 1.56    | 6         |
| Co/carbon nanotube                           | 63                                   | 1.34    | 7         |

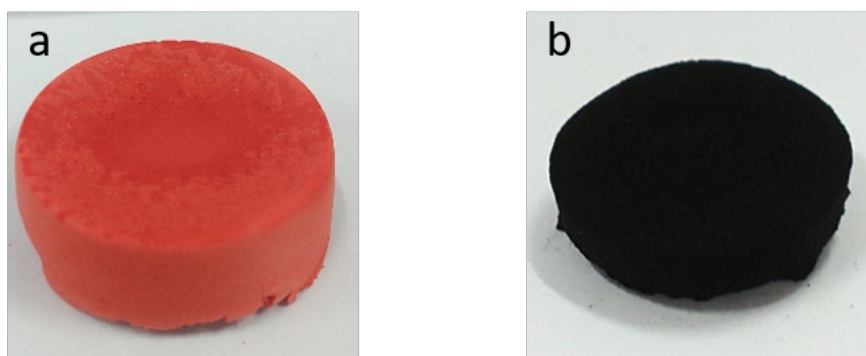

**Figure S1.** Digital photos of (a) freeze-dried  $G_{\text{Si-Zn}}/\text{Fe@CoPM}$  hydrogel and (b) NCAG/Fe-Co aerogel.

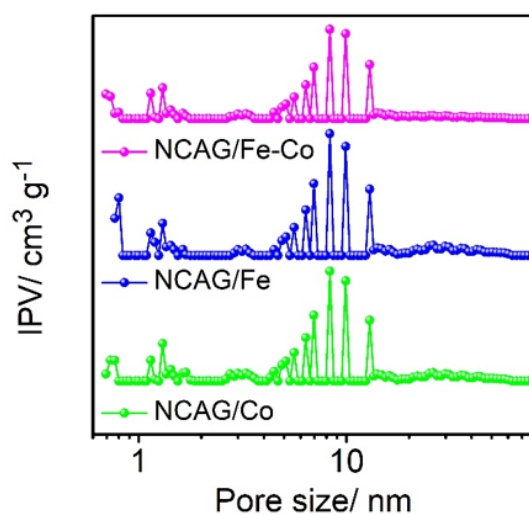

**Figure S2.** Pore-size distributions of NCAG/Fe-Co, NCAG/Fe, and NCAG/Co.

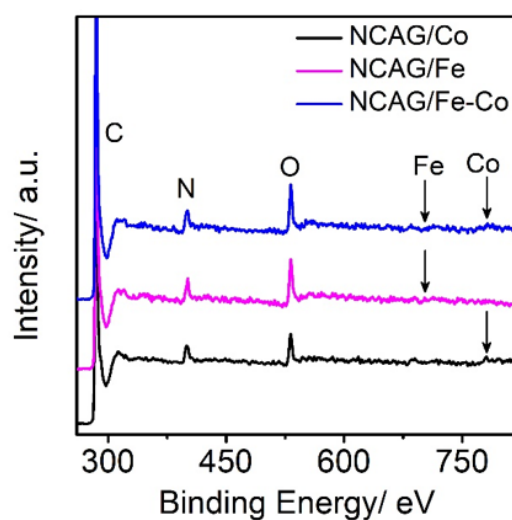

**Figure S3.** XPS survey spectra of NCAG/Co, NCAG/Fe, and NCAG/Fe-Co.

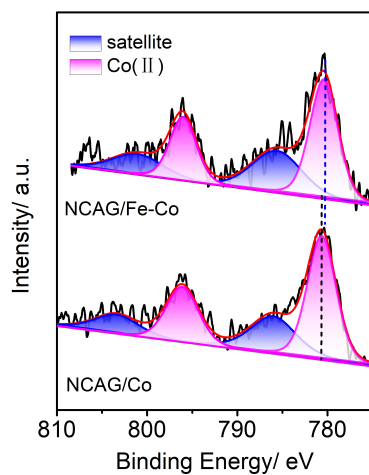

**Figure S4.** High-resolution XPS scan of the Co 2p electrons of NCAG/Fe-Co and NCAG/Co. Black curves are experimental data and shaded peaks are deconvolution fits.

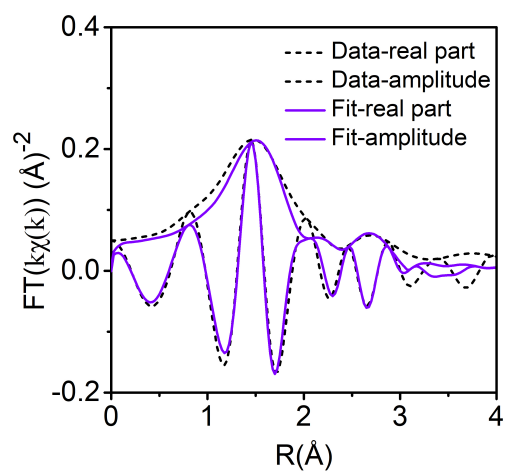

**Figure S5** Fe K-edge EXFAS of FePc and the fitting curve. The fitting result is summarized in Table S6.

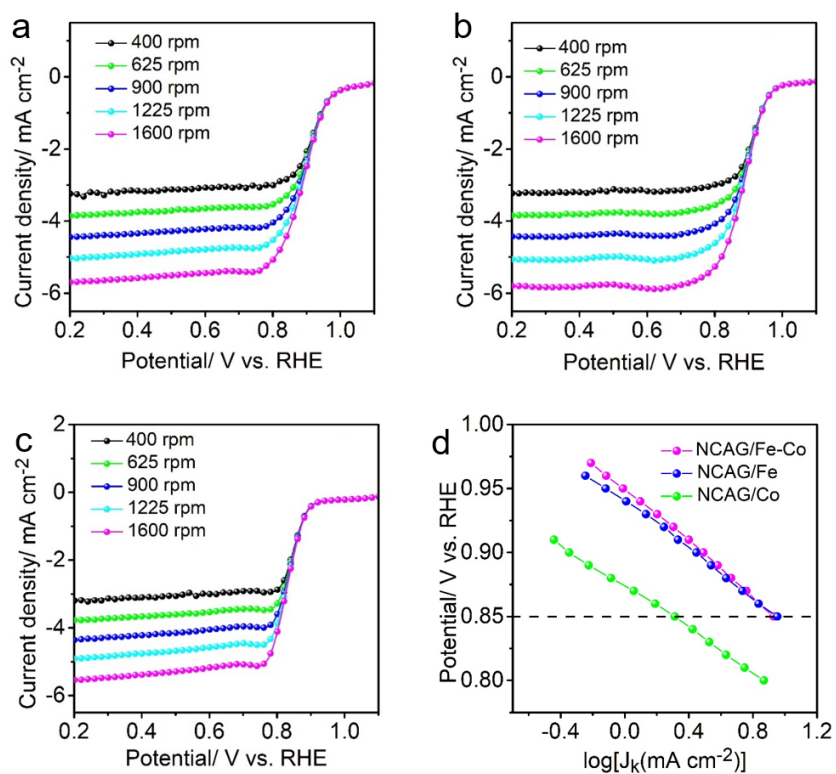

**Figure S6.** (a-c) ORR polarization curves of (a) NCAG/Fe-Co, (b) NCAG/Fe, and (c) NCAG/Co at various rotation speeds and (d) the corresponding Tafel plots.

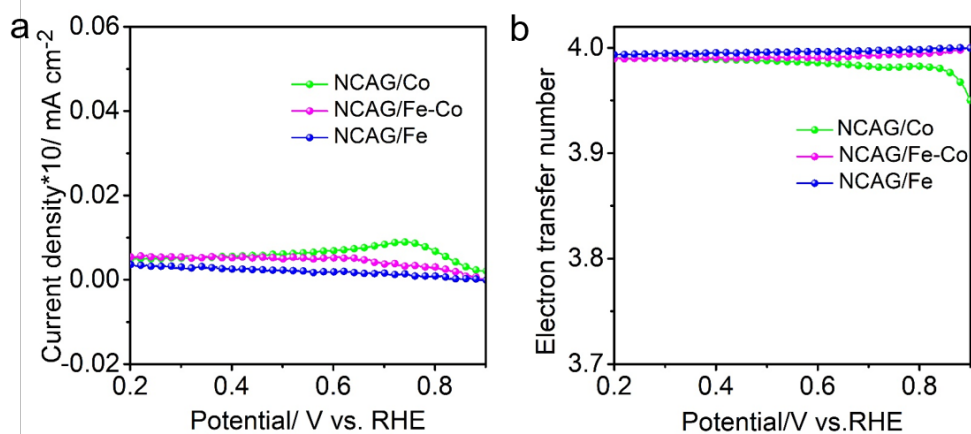

**Figure S7.** (a) Current density at the ring electrode during RRDE measurements, and (b) electron transfer number of NCAG/Co, NCAG/Fe, and NCAG/Fe-Co.

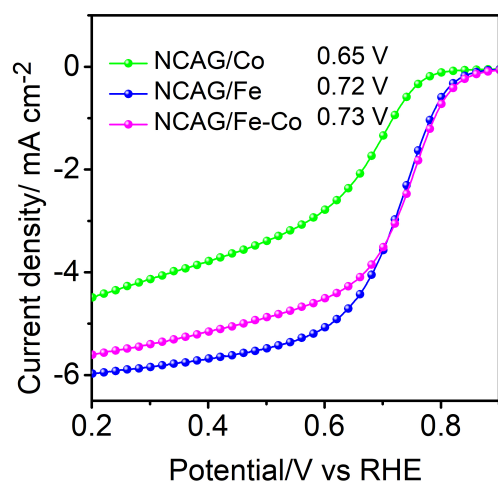

**Figure S8.** LSV curves of the ORR catalysts at 1600 rpm and  $5 \text{ mV s}^{-1}$  in  $0.1 \text{ HClO}_4$ . The half-wave potentials ( $E_{1/2}$ ) of NCAG/Co, NCAG/Fe and NCAG/Fe-Co are +0.65, +0.72 and +0.73 V, respectively.

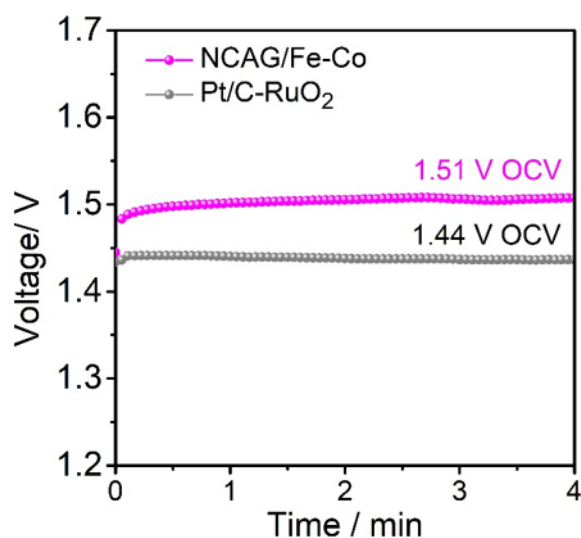

**Figure S9.** Open circuit voltage of liquid Zn-air battery using either NCAG/Fe-Co or Pt/C-RuO<sub>2</sub> mixture as the cathode catalyst.

## References

- 1 J. Bian, X. Cheng, X. Meng, J. Wang, J. Zhou, S. Li, Y. Zhang and C. Sun, *ACS Appl. Energy Mater.*, 2019, **2**, 2296-2304.
- 2 Z. Wang, J. Ang, B. Zhang, Y. Zhang, X. Y. D. Ma, T. Yan, J. Liu, B. Che, Y. Huang and X. Lu, *Appl. Catal., B*, 2019, **254**, 26-36.
- 3 Q. Xu, H. Jiang, Y. Li, D. Liang, Y. Hu and C. Li, *Appl. Catal., B*, 2019, **256**, 117893.
- 4 X. Chen, B. Liu, C. Zhong, Z. Liu, J. Liu, L. Ma, Y. Deng, X. Han, T. Wu and W. Hu, *Adv. Energy Mater.*, 2017, **7**, 1700779.
- 5 C.-Y. Su, H. Cheng, W. Li, Z.-Q. Liu, N. Li, Z. Hou, F.-Q. Bai, H.-X. Zhang and T.-Y. Ma, *Adv. Energy Mater.*, 2017, **7**, 1602420.
- 6 D. Liu, B. Wang, H. Li, S. Huang, M. Liu, J. Wang, Q. Wang, J. Zhang and Y. Zhao, *Nano Energy*, 2019, **58**, 277-283.
- 7 D. Ji, L. Fan, L. Li, N. Mao, X. Qin, S. Peng and S. Ramakrishna, *Carbon*, 2019, **142**, 379-387.
